# Supplementary material for: Modeling specific aneuploidies: from karyotype manipulations to biological insights
Source: PubMed Central journal article supplement (PMC10462580; doi:10.1007/s10577-023-09735-7), 2023-08-29
Supplement: 10577_2023_9735_MOESM1_ESM.pdf [file 10577_2023_9735_MOESM1_ESM.pdf]

# Modeling specific aneuploidies: from karyotype manipulations to biological insights

My Anh Truong\*, Paula Cané-Gasull\*, Susanne M. A. Lens#

Oncode Institute and Center for Molecular Medicine, University Medical Center Utrecht, Universiteitsweg 100, 3584 CG Utrecht, The Netherlands

\*Equal contribution

#Corresponding author.

Email: [s.m.a.lens@umcutrecht.nl](mailto:s.m.a.lens@umcutrecht.nl)

## Supplementary information

- Supplemental table 1:** Overview of the cell models generated by MMCT and trisomic mouse embryos after crossings between mice harboring Robertsonian chromosomes .....*page 2*
- Supplemental table 2:** Overview of cell lines and mouse strains with CRISPR-Cas9-mediated chromosome fusions.....*page 3*
- Supplemental table 3:** Comprehensive overview of current approaches to induce whole and arm-level chromosome loss in mammalian cells .....*page 4*

**Supplemental table 1. Overview of the cell models generated by MMCT and trisomic mouse embryos after crossings between mice harboring Robertsonian chromosomes**

| Approach                                         | Models                                                                 | Resulting trisomies   | References            |
|--------------------------------------------------|------------------------------------------------------------------------|-----------------------|-----------------------|
| MMCT                                             | hTERT-RPE1<br>( <i>hTERT immortalized retinal pigment epithelial</i> ) | Ts3; Ts5; Ts12; Ts21  | Passerini et al. 2016 |
|                                                  | DLD1 ( <i>colorectal cancer</i> )                                      | Ts13; Ts7; Ts3        | Phillips et al. 2001  |
|                                                  | hTERT-HME<br>( <i>hTERT immortalized human mammary epithelial</i> )    | Ts3                   |                       |
|                                                  | HE-35 ( <i>human embryonic fibroblasts</i> )                           | Ts8                   | Nawata et al. 2011    |
|                                                  | HCT116 ( <i>colorectal cancer</i> )                                    | Ts3; Ts5; Ts3+5       | Haugen et al. 2008    |
|                                                  | HCT116 ( <i>colorectal cancer</i> )                                    | Ts8; Ts13; Ts18; Ts21 | Vasudevan et al. 2020 |
| Crossing of mice with Robertsonian translocation | mESCs + whole mouse                                                    | Ts1; Ts13; Ts16; Ts19 | Williams et al. 2008  |

hTERT, human telomerase reverse transcriptase; MMCT, Microcell-mediated chromosome transfer; mESC, mouse embryonic stem cell; Ts, Trisomy

Of note, a larger collection of human, rat, and mouse cancer cells containing an additional human chromosome has been generated by MMCT to map human tumor-suppressor genes, and some of these earlier models already revealed effects of specific chromosomal gains in cancer (see main text; Uejima et al. 1995; Matsuda et al. 1997). These cell lines have been reviewed elsewhere (Kugoh et al. 2016) and are not included in this table.

**Supplemental table 2. Overview of cell lines and mouse strains with CRISPR-Cas9-mediated chromosome fusions.**

| Type of fused chromosome                 | Cell type                         | Resulted fusion chromosomes  | Viable heterozygous F1 pups <sup>*1</sup> | Viable homozygous F2 pups <sup>*2</sup> | References        |
|------------------------------------------|-----------------------------------|------------------------------|-------------------------------------------|-----------------------------------------|-------------------|
| Telocentric chromosome                   | ha-ESCs                           | Chr1+2                       | No                                        | -                                       | Zhang et al. 2022 |
|                                          |                                   | Chr4+5                       | Yes                                       | Yes                                     |                   |
| Robertsonian-like metacentric chromosome | AG-haESCs (sperm-like stem cells) | Rob(1;13)                    | Yes                                       | Yes                                     | Wang et al. 2022  |
|                                          |                                   | Rob(2; 6)                    | Yes                                       | Not tested                              |                   |
|                                          |                                   | Rob(2; 5)                    | Yes                                       | Not tested                              |                   |
|                                          |                                   | Rob(2; 11)                   | Yes                                       | Yes                                     |                   |
|                                          |                                   | Rob(2; 18)                   | Yes                                       | Not tested                              |                   |
|                                          |                                   | Rob(5; 17)                   | Yes                                       | Yes                                     |                   |
|                                          |                                   | Rob(7; 19)                   | Yes                                       | Not tested                              |                   |
|                                          |                                   | Rob(10;13)                   | Yes                                       | Not tested                              |                   |
|                                          |                                   | Rob(X;2), dup(14)            | No                                        | -                                       |                   |
|                                          |                                   | Rob(1;13).Rob(2;9)           | Not tested                                | -                                       |                   |
|                                          |                                   | Rob(1;13).Rob(2;9).Rob(7;19) | Not tested                                | -                                       |                   |

AG-haESCs, androgenic haploid embryonic stem cells; haESCs, haploid embryonic stem cell; Rob, Robertsonian chromosome; dup, duplicated; <sup>\*1</sup> embryos generated via oocytes injection of sperm-like nuclei carrying one fused chromosome; <sup>\*2</sup> embryos generated via crossing of heterozygous F1 adults.

**Supplemental table 3. Comprehensive overview of current approaches to induce whole and arm-level chromosome loss in mammalian cells**

| Approach                                        |                                    |                   | Genome editing tool | Species | Model system              | Targeted chromosome | Resulting aneuploidy    |                                 | Selection method | References                 |
|-------------------------------------------------|------------------------------------|-------------------|---------------------|---------|---------------------------|---------------------|-------------------------|---------------------------------|------------------|----------------------------|
|                                                 |                                    |                   |                     |         |                           |                     | Type                    | Verification method             |                  |                            |
| <b>Cre/loxP-mediated chromosome elimination</b> |                                    |                   | Cre/loxP            | mouse   | mESC-somatic cell hybrids | 6, 11, 12           | whole                   | karyotyping, FISH painting      | FACS             | Matsumura et al. 2007      |
|                                                 |                                    |                   | Cre/loxP            | mouse   | mESC-somatic cell hybrids | 6, 11, 12, 17       | whole, segmental        | karyotyping, FISH painting      | FACS             | Otsuji et al. 2008         |
|                                                 |                                    |                   | Cre/loxP            | mouse   | tetraploid MEFs           | 9, 10, 12, 14       | whole, segmental        | karyotyping, WGS                | FACS             | Thomas et al. 2018         |
|                                                 |                                    |                   | Cre/loxP            | mouse   | lymphocytes               | 4, 9, 10, 11, 14    | whole, segmental        | karyotyping, FACS               | FACS             | Zhu et al. 2010            |
|                                                 |                                    |                   | Cre/loxP            | mouse   | embryos                   | Y                   | whole                   | dot blot assay                  | -                | Lewandoski and Martin 1997 |
|                                                 |                                    |                   | Cre/loxP            | mouse   | embryos                   | 2                   | whole                   | FISH, qPCR                      | -                | Grégoire and Kmita 2008    |
|                                                 |                                    |                   | Cre/loxP            | human   | HeLa                      | 21                  | whole                   | FISH                            | HSV-TK           | Sato et al. 2017           |
|                                                 |                                    |                   | Cre/loxP            | human   | DS iPSCs                  | 21                  | whole                   | karyotyping, FISH               | HSV-TK           | Wakita et al. 2022         |
| <b>Nuclease-mediated chromosome elimination</b> | <b>Truncation or fragmentation</b> | <b>Arm DSB(s)</b> | CRISPR/Cas9         | mouse   | mESCs                     | h14                 | whole, segmental        | PCR genotyping, FISH, WGS       | -                | Zuo et al. 2017            |
|                                                 |                                    |                   | CRISPR/Cas9         | mouse   | mESCs                     | Y                   | whole, segmental or arm | FISH, qPCR                      | -                | Adikusuma et al. 2017      |
|                                                 |                                    |                   | CRISPR/Cas9         | mouse   | mESCs                     | Y                   | whole                   | karyotyping FISH painting, WGS  | -                | Zuo et al. 2017            |
|                                                 |                                    |                   | CRISPR/Cas9         | mouse   | embryo brain              | Y                   | whole                   | FISH painting                   | -                | Zuo et al. 2017            |
|                                                 |                                    |                   | CRISPR/Cas9         | mouse   | zygotes                   | Y                   | whole                   | karyotyping, FISH painting, WGS | -                | Zuo et al. 2017            |
|                                                 |                                    |                   | CRISPR/Cas9         | mouse   | zygotes                   | X                   | whole                   | karyotyping, FISH, WGS          | -                | Zuo et al. 2017            |
|                                                 |                                    |                   | CRISPR/Cas9         | mouse   | zygotes                   | 2, 17               | whole, segmental        | WGS                             | -                | Papathanasiou et al. 2021  |

|                                                 |                                    |                                              |                                               |       |                          |             |                                                                    |                        |              |                         |
|-------------------------------------------------|------------------------------------|----------------------------------------------|-----------------------------------------------|-------|--------------------------|-------------|--------------------------------------------------------------------|------------------------|--------------|-------------------------|
| <b>Nuclease-mediated chromosome elimination</b> | <b>Truncation or fragmentation</b> | <b>Arm DSB(s)</b>                            | CRISPR/Cas9                                   | human | HT29                     | 7           | whole, structural changes (rearrangements)                         | FISH painting          | -            | Zuo et al. 2017         |
|                                                 |                                    |                                              | CRISPR/Cas9                                   | human | DS iPSCs                 | 21          | whole                                                              | FISH                   | -            | Zuo et al. 2017         |
|                                                 |                                    |                                              | CRISPR/Cas9                                   | human | hTERT-RPE1               | 2p, 5q, 6q  | arm, segmental, structural changes (rearrangements, fragmentation) | scWGS                  | -            | Leibowitz et al. 2021   |
|                                                 |                                    |                                              | CRISPR/Cas9                                   | human | T cells                  | 7q          | segmental                                                          | scRNA-seq              | -            | Nahmad et al. 2022      |
|                                                 |                                    |                                              | CRISPR/Cas9                                   | human | zygotes                  | X           | segmental                                                          | SNP array              | -            | Turocy et al. 2022      |
|                                                 |                                    | <b>Centromeric or pericentromeric DSB(s)</b> | CRISPR/Cas9                                   | mouse | mESCs                    | Y           | whole                                                              | FISH, qPCR             | -            | Adikusuma et al. 2017   |
|                                                 |                                    |                                              | CRISPR/Cas9                                   | mouse | MB49                     | Y           | whole                                                              | RT-qPCR                | -            | Abdel-Hafiz et al. 2023 |
|                                                 |                                    |                                              | CRISPR/Cas9                                   | mouse | hematopoietic stem cells | Y           | whole                                                              | karyotyping, FISH      | -            | Sano et al. 2022        |
|                                                 |                                    |                                              | CRISPR/Cas9                                   | mouse | zygotes                  | Y           | whole, arm                                                         | qPCR                   | -            | Adikusuma et al. 2017   |
|                                                 |                                    |                                              | CRISPR/Cas9                                   | human | A2058                    | 1q, 7p, 8q  | arm                                                                | karyotyping, WGS       | -            | Girish et al. 2023      |
|                                                 |                                    |                                              | CRISPR/Cas9                                   | human | A2780                    | 1q          | arm                                                                | karyotyping, WGS       | HSV-TK, FACS | Girish et al. 2023      |
|                                                 |                                    |                                              | CRISPR/Cas9                                   | human | AGS                      | 1q          | arm                                                                | WGS                    | HSV-TK, FACS | Girish et al. 2023      |
|                                                 |                                    |                                              | CRISPR/Cas9                                   | human | MCF10A                   | 1q          | arm                                                                | WGS                    | -            | Girish et al. 2023      |
|                                                 |                                    |                                              | CRISPR/Cas9                                   | human | HCT116                   | 8q          | arm                                                                | WGS                    | -            | Girish et al. 2023      |
|                                                 |                                    |                                              | CRISPR/Cas9                                   | human | T cells                  | 14q         | arm                                                                | FISH, ddPCR, scRNA-seq | -            | Nahmad et al. 2022      |
|                                                 |                                    |                                              | CRISPR/Cas9                                   | human | zygotes, embryos         | 6q          | whole, arm                                                         | SNP array              | -            | Zuccaro et al. 2020     |
|                                                 |                                    |                                              | CRISPR/Cas9                                   | human | zygotes                  | 16, X       | whole, arm, structural changes (fragmentation)                     | SNP array              | -            | Turocy et al. 2022      |
|                                                 |                                    |                                              | <b>Centromere-proximal and -distal DSB(s)</b> | TALEN | human                    | MCF10A      | 8p12-8p23                                                          | segmental              | SNP array    | -                       |
|                                                 |                                    | CRISPR/Cas9                                  |                                               | human | SKNSH                    | 11q13-11q25 | segmental                                                          | karyotyping, WGS       | -            | Eleveld et al. 2021     |
|                                                 |                                    | CRISPR/Cas9                                  |                                               | human | NMB                      | 6q22-6q27   | segmental                                                          | WGS                    | -            | Eleveld et al. 2021     |

|                                                 |                               |             |         |        |      |     |                   |                |                    |
|-------------------------------------------------|-------------------------------|-------------|---------|--------|------|-----|-------------------|----------------|--------------------|
| <b>Nuclease-mediated chromosome elimination</b> | <b>Telomere incorporation</b> | CRISPR/Cas9 | hamster | CHO-K1 | h21q | arm | karyotyping, FISH | Fcy::Fur, hisD | Uno et al. 2017    |
|                                                 |                               | CRISPR/Cas9 | human   | AALE   | 3p   | arm | karyotyping, WGS  | pac            | Taylor et al. 2018 |
|                                                 |                               | CRISPR/Cas9 | human   | AALE   | 8p   | arm | WGS               | pac            | Shih et al. 2023   |
|                                                 |                               | CRISPR/Cas9 | human   | AGS    | 1q   | arm | karyotyping, WGS  | pac            | Girish et al. 2023 |
|                                                 |                               | CRISPR/Cas9 | human   | MCF10A | 1q   | arm | WGS               | pac            | Girish et al. 2023 |

AALE, human lung epithelial cell line; A2058, human melanoma cell line; A2780, human ovarian cancer cell line; AGS, human gastric cancer cell line; CHO-K1, Chinese hamster ovary-K1 cell line; ddPCR, digital droplet PCR; DS iPSCs, Down syndrome induced pluripotent stem cells; DSB, DNA double stranded break; FACS, fluorescence-activated cell sorting; Fcy::Fur, cytosine deaminase and uracil phosphoribosyl-transferase fusion gene; FISH, fluorescence in situ hybridization; HCT116, human colorectal cancer cell line; HeLa, human cervical cancer cell line; HisD, L-histidinol dihydrochloride gene; HR, homologous recombination; HSV-TK, herpes simplex virus thymidine kinase gene; HT29, human colorectal cancer cell line; MB49, mouse bladder cancer cell line; MCF10A, human mammary epithelial cell line; MEF, mouse embryonic fibroblasts; mESC, mouse embryonic stem cells; NMB, human neuroblastoma cell line; pac, puromycin N-acetyltransferase gene; qPCR, quantitative polymerase chain reaction; hTERT-RPE1, hTERT immortalized retinal pigment epithelial cell line; RT-qPCR, quantitative reverse transcription PCR; scRNA-seq, single-cell RNA sequencing; scWGS, single-cell whole genome sequencing; SKNSH, human neuroblastoma cell line; SNP array, single nucleotide polymorphism array; TALEN, transcription activator-like effector nuclease; WGS, whole genome sequencing; ZFN, zinc finger nuclease
